# Supplementary material for: Comparison between Traditional Chinese Medicine Constitution and Blood Biochemical Markers Associated with Left and Right Mammary Hyperplasia in Rural Areas of Southwest China
Source: Hindawi journal article supplement (doi:10.1155/2022/9274060), 2022-03-23
Supplement: f1 [file 9274060.f1.zip]

Archive with 2 entries (2 files):
- 9274060.f1/Supplementary table 1.doc
- 9274060.f1/Supplementary table 2.doc
